# Supplementary material for: Evolution of a transcriptional regulator from a transmembrane nucleoporin
Source: PubMed Central journal article supplement (PMC4888837; doi:10.1101/gad.280941.116), 2016-05-15

## Supplemental Material

### Oligonucleotide sequences used

sPom121 siRNA - sense - 5' GCAACUUGCCCAAGUCCUUTT 3'

sPom121 siRNA - anti-sense – 5' AAGGACUUGGGCAAGUUGCTT 3'

sPom121 qPCR – F - TAA CGG GAG GTG AAT TTC CA

sPom121 qPCR – R - ATG GAT CGG ATA GCG TCT TC

Pom121 TM domain – F - GAG CCC CGA GGT TCG CGC CCC

Pom121 TM domain – R - CAG GTA ACT GCC CAT GAG TAG

18s rRNA- F - GTG GAG CGA TTT GTC TGG TT

18s rRNA- R - CGC TGA GCC AGT CAG TGT AG

B-actin-qPCR1-F - GGA CTT CGA GCA AGA GAT GG

B-actin-qPCR1-R - AGC ACT GTG TTG GCG TAC AG

B-actin-qPCR2-F - GGC ATC CTC ACC CTG AAG TA

B-actin-qPCR2-R - GGG GTG TTG AAG GTC TCA AA

Ext1-F- ATT GTG ACA AGC CCC TAC CA

Ext1-R- TGA AGG CGA AAT CCA CCT CT

FoxP2-F- GCA ACT CTC ATA AGG CAG GC

FoxP2-R- TTT GTG ACC TTC GCT TCT GG

Myc-F- CTC CTG GCA AAA GGT CAG AG

Myc-R- TCG GTT GTT GCT GAT CTG TC

Dkk1-F- CCT TGG ATG GGT ATT CCA GA

Dkk1-R- TCC ATG AGA GCC TTT TCT CC

RBAK-F- TCG GAT GTC AAA CCT CAC TG

RBAK-R- TTG AAG GCT GAT CTG TGG TG

TFAP2A-F- GAT CCT CGC AGG GAC TAC AG

TFAP2A-R- TTG CTG TTG GAC TTG GAC AG

## Supplemental Figure Legends

**Supplemental Figure 1. Identification of a new Pom121 mRNA from which sPom121 is produced.** (A) Agarose DNA gel showing migration of RACE clones from six different cell lines (B) An example of an sPom121 sequence identified by 5' RACE. The 5' adapter sequence is shown in orange, the 5' UTR of sPom121 is shown in black, the coding region of sPom121 is shown in red. (C) An example of Pom121 sequence identified by 5' RACE. The cloning adapter is shown in orange, while the 5' UTR is shown in black, exon 4 containing the TM domain of Pom121 is shown in blue and the coding region of Pom121 is shown in red. (D) Pom121 specific cDNA was made from HeLa-C, U2OS or IMR90 RNA. The 5' end of Pom121 mRNAs were cloned and sequenced. Clones containing the TM domain of Pom121 are shown in blue, while sPom121 specific exons are shown in grey. The region common to both Pom121 and sPom121 is shown in black. The number of clones that correspond to each transcript are indicated on the right. (E) Expression of other Nups relative to actin in various human

tissues and cell lines. (F) Correlation graphs of various Nups with sPom121 expression in various human tissues and cell lines. Relative sPom121 levels are graphed on the x-axis, while the comparative Nup of choice is mapped on the y-axis. The  $R^2$  values and correlation coefficient (R) are shown in the upper left portion of the graph. In general expression of sPom121 correlated with expression of Pom121, Nup98 and especially Nup133. Only a moderate-weak correlation was observed between sPom121 expression and Nup93 or NDC1 expression.

**Supplemental Figure 2. sPom121 and the Nup107/160 complex localize in the**

**nucleoplasm in human cells** (A) IF image showing co-localization of nucleoplasmic Pom121 (panel 1) with Nup98 (panel 2) using a third antibody that recognizes a different region than those antibodies used in Figure 1B. (B) IF assays showing localization of the Nup listed to the left of each row in HeLa-C cells (panels 1, 4, 7 and 10) as compared to Nup98 (panels 2, 5, 8 and 11). Merged images are shown in the right column (panels 3, 6, 9, and 12). The percentage of cells with the Nup co-localizing with Nup98 in the nucleoplasm is shown in the bottom right corner of the left panels, while the number of cells counted is shown in parenthesis. (C) IF assays showing localization of the Nup listed to the left of each row (panels 1, 4, 7, 10, 13, 16, 19 and 22) as compared to Nup98 (panels 2, 5, 8, 11, 14, 17, 20 and 23). Merged images are shown in the right column (panels 3, 6, 9, 12, 15, 18, 21, 24). The percentage of cells with the Nup co-localizing with Nup98 in the nucleoplasm is shown in the bottom right corner of the left panels, while the number of cells counted is shown in parenthesis. (D) IF assays showing localization of endogenous Pom121 (panels 1, 4 and 7) with GFP-Nup98 (panels 2, 5, and 8) in HeLa, U2OS or IMR90 cells. Merged images are shown in panels 3, 6, and 9. The percentage of cells with Pom121 co-localizing with GFP-Nup98 in the

nucleoplasm is shown in the bottom right corner of the left panels, while the number of cells counted is shown in parenthesis.

**Supplemental Figure 3. sPom121 and Nup98 bind and regulate common genes in**

**HeLa-C cells.** (A) DamID traces from HeLa-C cells for the genes indicated at the bottom. Peaks are shown relative to a schematic of the gene. Peaks that were called by peak calling software are shown at the top. (B) qPCR expression results from HeLa-C cells treated with either Fluc (grey bar), sPom121 (red bar) or Nup98 siRNA (blue bar). (C) DamID traces from HeLa-C cells comparing sPom121 binding to a Nup98 mutant that cannot bind the NPC (Nup98 $\Delta$ CTD). Peaks are shown relative to a schematic of the gene. Peaks that were called by peak calling software are shown at the top. (D) Schematic describing design of sPom121 siRNA. sPom121 siRNA is targeted to a sequence that is not shared with Pom121, RBAK or another gene that shares a similar 5'UTR to sPom121, PomZP3. (E) qPCR results showing expression of sPom121 and Pom121 in the presence of a control siRNA (Fluc) (blue bars) or the sPom121 siRNA (red bars).

**Supplemental Figure 4. Global protein transport and NPC density are not affected**

**by sPom121 knockdown.** (A) Graph showing results of FRAP assays used to test fluorescence recovery of NLS-NES-tdTomato in cells treated with either Fluc siRNA (blue) or sPom121 siRNA (red). The nucleus of U2OS cells was bleached and the movement of cytoplasmic localized protein to the nucleus was observed for 180 seconds. (B) Measurement of NPC density in U2OS cells treated with siRNAs against Fluc, sPom121 or a positive control protein, Nup96. (C) Gene ontology of gene families

misregulated in sPom121 knockdown cells. The cluster, # of genes misregulated and p-values are indicated. The different cell types assayed are indicated on the left.

**Supplemental Figure 5. sPom121 and Nup98 co-regulate genes in IMR90 cells.**

List of genes most misregulated when IMR90 cells are treated with an sPom121 or Nup98 siRNA. The gene name, Log2 fold change, p-value and adjusted p-value are indicated.

**Supplemental Figure 6. sPom121 and Nup98 co-regulate genes in HEPG2 cells.**

List of genes most misregulated when HEPG2 cells are treated with an sPom121 or Nup98 siRNA. The gene name, Log2 fold change, p-value and adjusted p-value are indicated.

**Supplemental Figure 7. sPom121 expression in marmoset, rhesus macaque and**

**cow.** (A-B) RNA-seq showing Pom121 expression profiles in various marmoset and rhesus macaque tissues. (C) RNA-seq showing expression profiles of Pom121 in cow tissues. The vertical axis is scaled for each track as not to crop the higher expressing peaks. Expression of Pom121 is approximately the same for all tissues except the testis where expression of Pom121 was typically 3-4 fold higher. Notably, no expression of the sPom121 specific exon (first exon) was observed in tissues besides testis even if the Y-axis was manipulated to enhance the size of the first exon (sPom121 specific exon). A red arrow is used to indicate where the RNA-seq peak corresponding to the sPom121 specific exon is expected to be located. This peak is visible in marmoset and macaque testis samples, but absent in cow tissues.



A

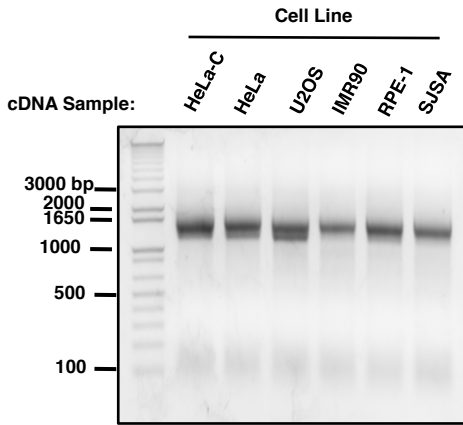

B

**sPom121 RACE Clone**

Cloning Adapter - **GCGGCCGCTTATTAACCCTCACTAAAGGCCACCTCCGCACTGCCCTCGCTTCTCGCCTCTTCAGGTCACCGCTTGCTCTAGTTCCAGGCTTTGGCCTCTAGTGGATGAGAATCACCGAGTCTGCGGGGCTGGACGCTGACCGCCGGGCCAGCACCTAGCCGGCGGAGCTGTGCGGCCAGGGTTTCGCGGGGCCGGGTAGAGGGCTCGAGCCGGACCCCGAGCGTGAACCCCGGAGCCAGCGGGCTGGGGCCAGAGGGGCCAGGCCGGGAGGTGTGGCGGAGGCGAAGGGGGCAGCGGACCTGGGCCTGGCCCGTGTGTCTCGCGCCCTGGCGCCGCTGGCGCCGCTCGCTGTA**

5' UTR - **CGTGTGTCTCGCGCCCTGGCGCCGCTGGCGCCGCTCGCTGTA**

ORF sPom121 - **CGTGTGTCTCGCGCCCTGGCGCCGCTGGCGCCGCTCGCTGTAACCCCGCTGGATTTGCCCGTAGGCCCGGCCGGGCCCTCGGGAGCAGAACAGCCTTGGTGTGAGGTGACGGGAGGGGACTTCGCGAGCAGACGCGCGCCAGCGACAGCAGCCGCCCGCCCTCTCGGAGCCGTGGGGCAGAGCTGCAGAGCCAGGAGGGGGCAGTGTCAATCAAAGATGTGGCTGGATTTACCCAGGAGGATGTGGAACTGGACCTGATGAGAAGATAACATACGGGGATGTGATGTTGGAGAAGTACAGCCATCTAGTTTCCCTGGCTTATGAGGTGGCAACATCTGTACTTCCGGAGATCTGAAGCCGAGCAACTTGCCCAAGTCCCTTTCTTTCCCATTAACAAGATATGATATCACAAGCCAAACGTCATCATTAAGTTGGAGCAGGGAGAGGAGCTGTGGATAACGGGAGGTGAATTTCCATGTCAACATAGTCCAGGGATTGTGGACTTTACCAAATCGGTTTGAATAACACCTAGAAGACGCTATCCGATCCATCAGGCCAGTATTCCTGTCTGGGGTACTTCCCACGTGTGCTGGAATGGAATGGTTATCACAAGAAGGCTGTGCTGTCCCTTCGCAACTCCAGGATGGTGTAGCCAGTGAAGGATCGCCCTCTGACAGAAGATTTTCGCGTCTGCGATACCAAGCAGATAATCAGCTCAACTGTCTCACCTCAAGTAAAGCCAGACCCATGTGCAAAAGGAGACAGTACTGAGTGCCCTCAAAGAGAAGGAGAAGAAAAGGACAGTGGAGGAAGAAAGCCAAATATTCCTTGTGATGGCCAGGAAAATAAAGAAAGGCGCCATGATAGCAGTGGCAGTGGACATTCAGCATTGAGCCCTCTGGTGGCCAGTGGAGTCCCGCTCTTTTGTGCTAAGCCTGGTCTCTGAAGAGAGGCCTCAATTCTCAGAGGACCCAGCTTTCTGTACAAAGTTGGCATTATAAGAAAGCATGCTTATCAATTTGTGCAACGAAACAGGTCACCTATCAGTCAAATAAAATCATTATTGCCTCCAGCTGCAGTCGCCCC**

D

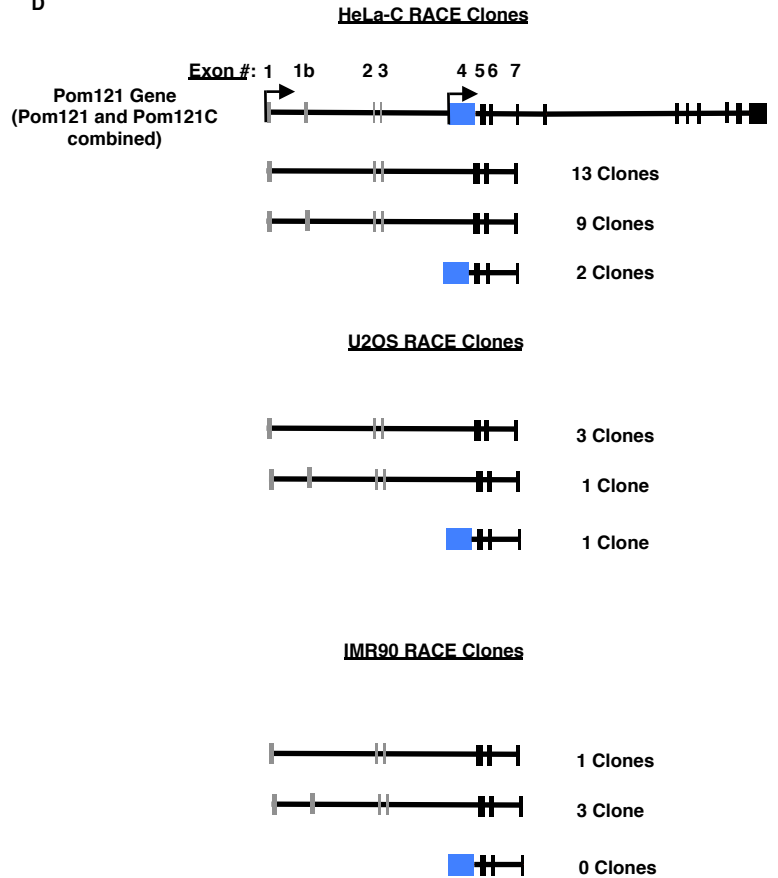

C

**Pom121 RACE Clone**

Cloning Adapter - **GCGGCCGCTTATTAACCCTCACTAAAGAGTCTCCTCCGCGC**

5' UTR - **GCGCGGAGCCGCGATGTCTCGGGCGCTGCGGCCGCTGAGCAGGCGAGCGGGCGCGGCCGATAGCGAGTGTCAAGGACGCGGGGCCGGGCTGCGCGGGCCCGGGGCGGGCGCTTCTCGCCTGTGCTGTGCTGCGCCTCCTACTGTACCTCGTGCCTGCTGCGGCTGCGCTGGCCTGGCTGGCCGTGGGGACTACCGCGGCCTGGTGGGGACTGAGCCGCGGACCCCGAGGTTTCGCGCCCTTGTCTCCTTCGTTCAAGAGCCGACATCGGCGAACAACACTGTTCGCTTCCGCTCCGCGC**

Exon4 (TM domain) - **CAAGTGCAGAGCCAAACGAAACCTCCTAGAGCCGCGGACCCCTGCTGAAGGACTGACCCTGCCGAAGTGTCTCTCATGGCAGTTACCTGAGCAAGCCCGGCCGCGCAGCCGCCCGCTCCGAGGGCCAGGACCTGCGGAATAGGCC**

ORF Pom121 - **TGGCCGCGCCACCCCGCCCGCCCGCCGCGCTCCGCTCCAGCACCGCCCTCCCGCCGAGTGTGCAAGAGGATGTCACAGTGTGCTGGAATGTTATCACAAGAAGGCTGTGCTGTCCCTCGCAACTCCAGGATGGTGTAGCCAGTGAAGGATCCGCCCTCTGACAGAAGATTTTACAGTTCGCGATACCAAGCAGATAATCAGCTCACACTGTCGTCACATCAAGTATTGCCAGACCCATGTGCAAAAGGAGACTGTACTGAGTGCCTCAAAGAGAAGAAGAAAGGAGGACAGTGGAGGAAGAAAGCCAAATATTCCTTGTGATGGCCAGGAAAATAAAGAAAGGCGCCATGATAGCAGTGGCAGTGGACATTCAGCATTGAGCCCTCTGGTGGCCAGTGGAGTCCCGCTCTTTTGTGCTAAGCCTGGTCTCTGAAGAGAGGCCTCAATTCTCAGAGGACCCAGCTTTCTGTACAAAGTTGGCATTATAAGAAAGCATGCTTATCAATTTGTGCAACGAAACAGGTCACCTATCAGTCAAATAAAATCATTATTGCCTCCAGCTGCAGTCGCCCC**

E

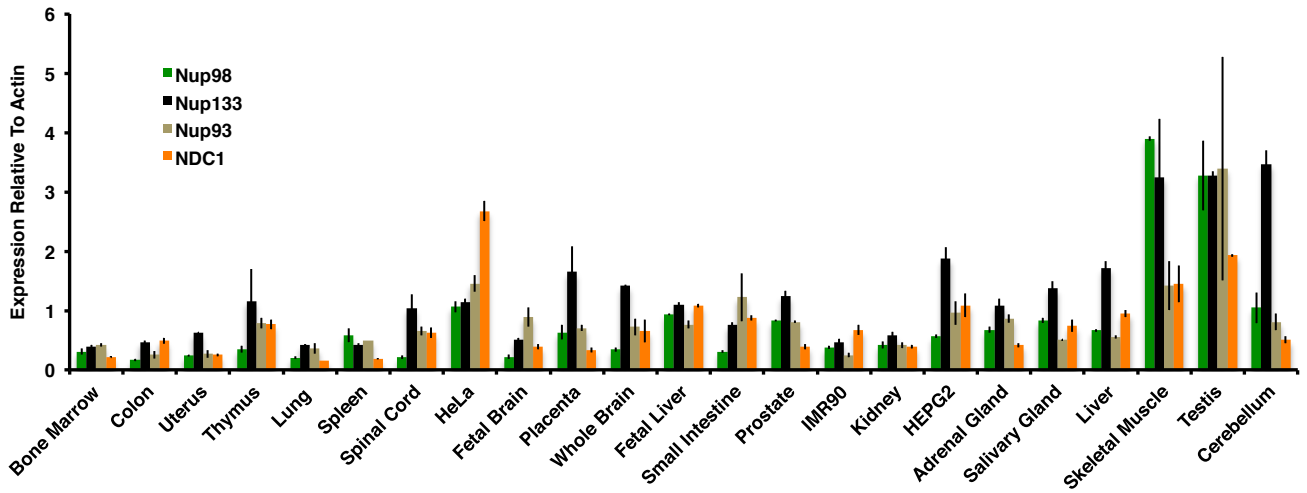

F

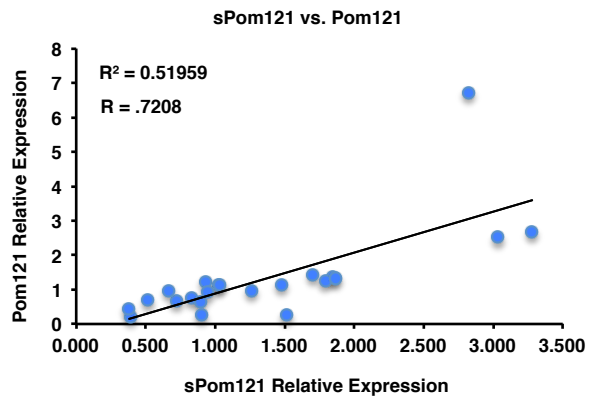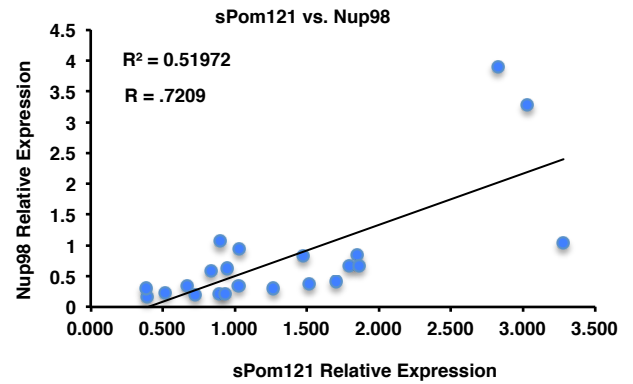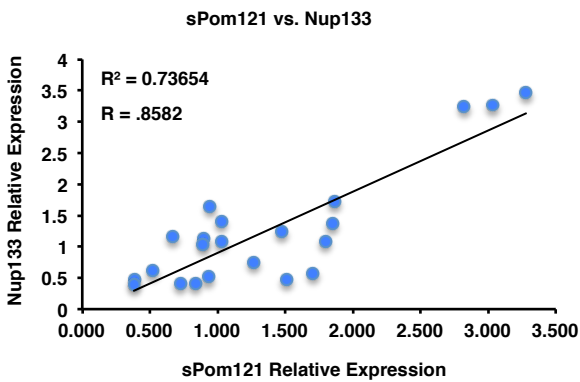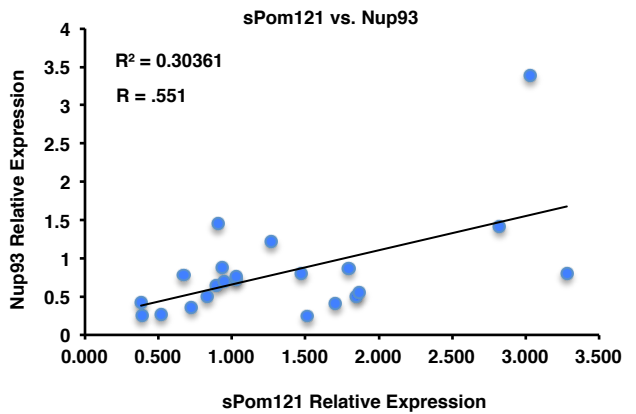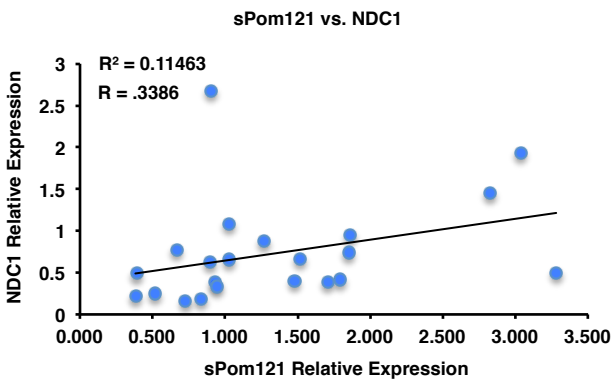



A

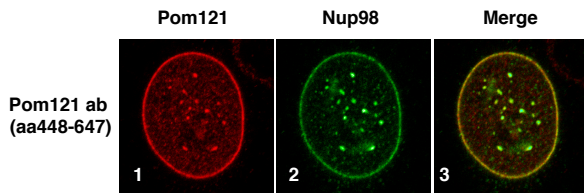

B

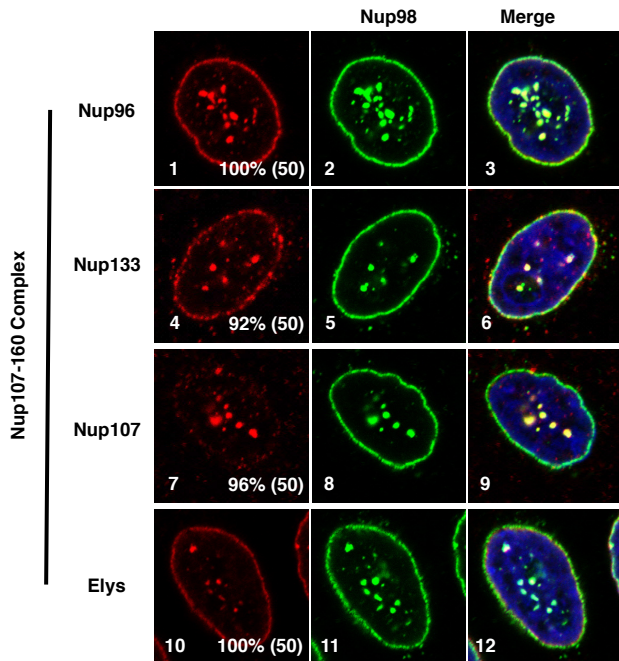

D

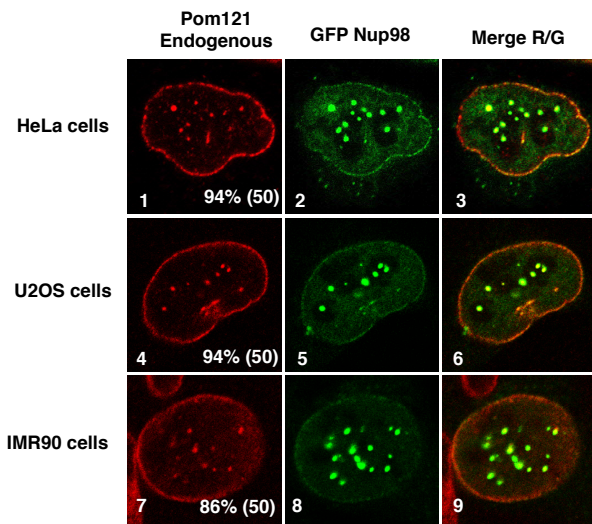

C

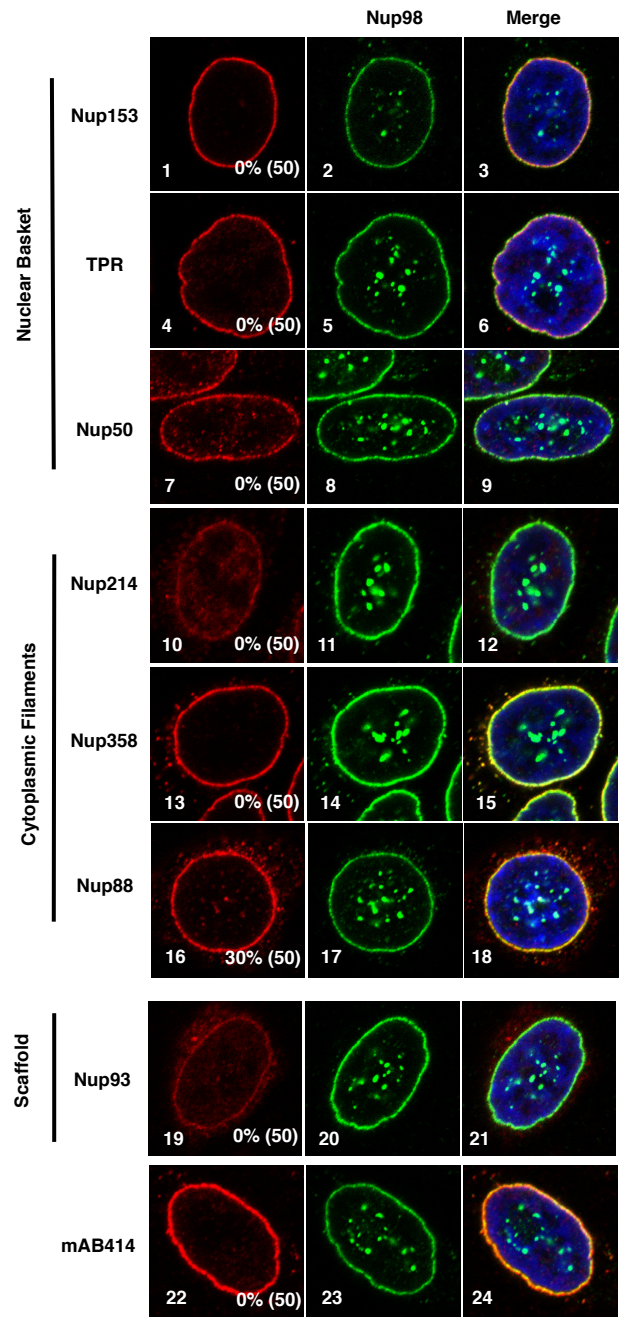

**A**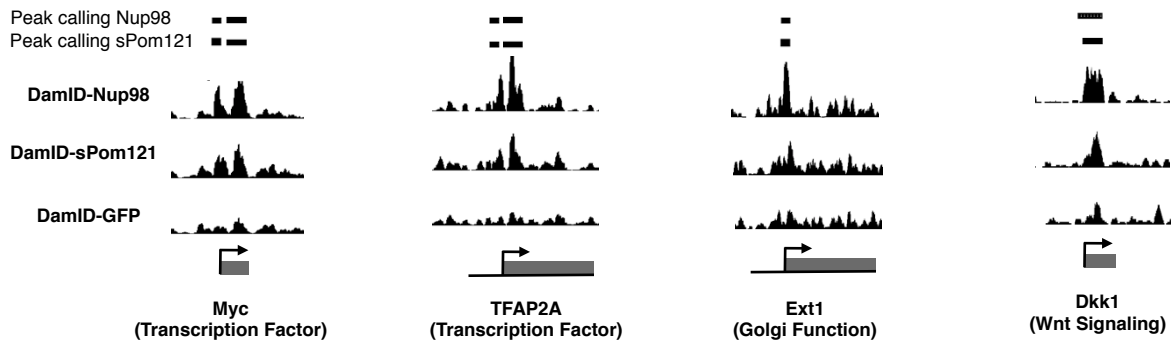**B**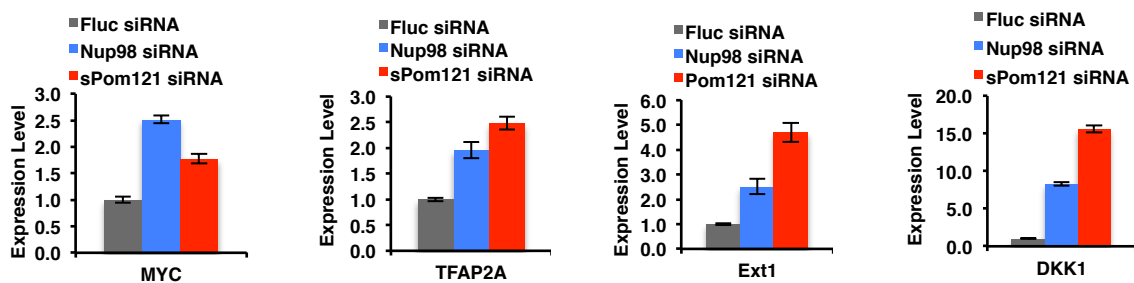**C**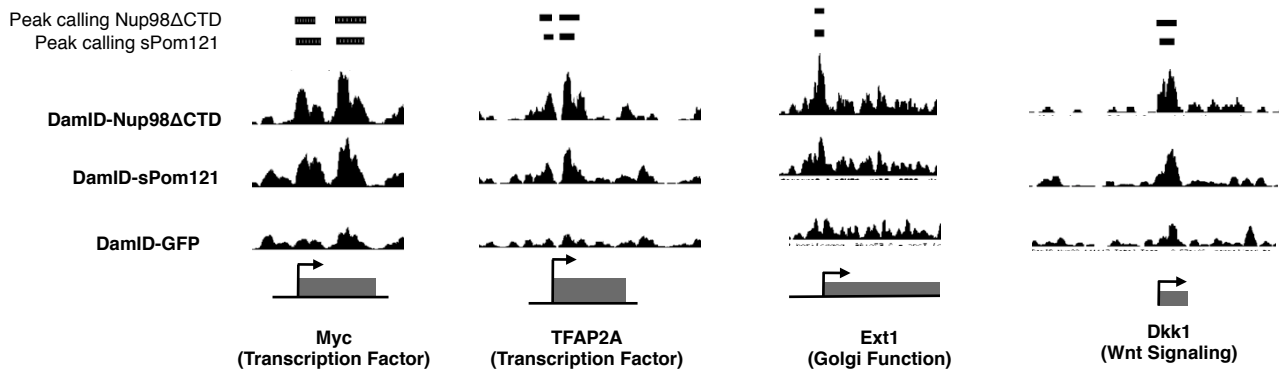**D**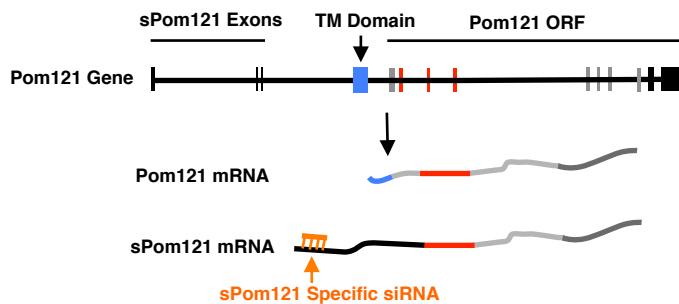**E**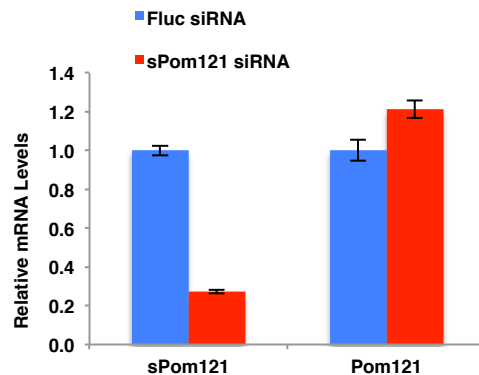

A

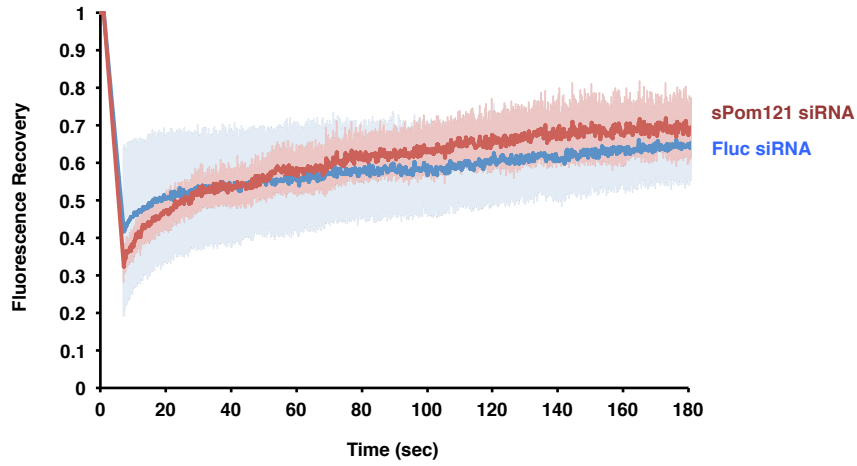

B

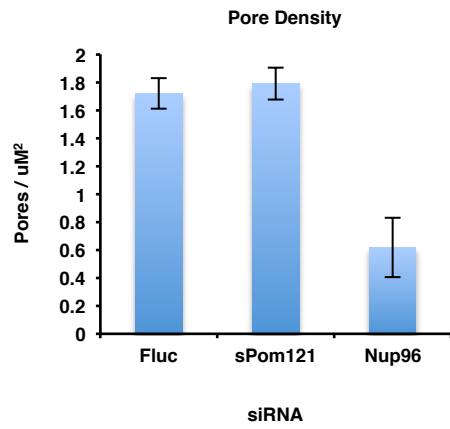

C

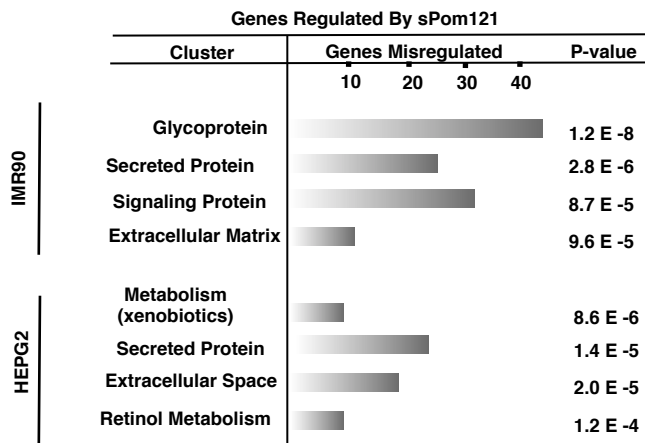

| Gene Name                                                                                              | Nup98 siRNA      |                 |                  | sPom121 siRNA    |                 |                  |
|--------------------------------------------------------------------------------------------------------|------------------|-----------------|------------------|------------------|-----------------|------------------|
|                                                                                                        | Log2 Fold Change | P-Value         | Adjusted P-Value | Log2 Fold Change | P-Value         | Adjusted P-Value |
| PARM11Cipar1IDKFZP564O0823IPARM-11WSC41-I4q13.3-q21.3 protein-coding                                   | -5.15            | 1.63E-19        | 7.12E-16         | -4.70            | 1.75E-17        | 4.08E-13         |
| CLDN11ICLD11ILVASCISEMP1-I3q28-q29 protein-coding                                                      | 4.40             | 4.27E-16        | 1.25E-12         | 4.61             | 3.11E-17        | 4.08E-13         |
| SLITRK6IDFNMYPI-I13q31.1 protein-coding                                                                | -2.68            | 5.18E-08        | 2.16E-05         | -4.29            | 6.44E-16        | 5.64E-12         |
| TYRP1ICAS2ICATBIGP75IOCA3ITRPITRPI1TYRPIb-PROTEINI-I9p23 protein-coding                                | -3.29            | 2.06E-09        | 1.39E-06         | -4.24            | 4.27E-13        | 2.80E-09         |
| <b>CFTRIABC35IABCC7ICFCFTR/MRPIMRP7ITNR-CFTRIdJ760C5.11-I7q31.2 protein-coding</b>                     | <b>-3.01</b>     | <b>6.59E-09</b> | <b>4.03E-06</b>  | <b>-3.90</b>     | <b>6.37E-13</b> | <b>3.34E-09</b>  |
| TMEM1001-I117q22 protein-coding                                                                        | -1.92            | 1.26E-04        | 1.80E-02         | -4.01            | 1.47E-12        | 6.42E-09         |
| BMP51-I-I6p12.1 protein-coding                                                                         | -0.90            | 5.60E-02        | 1.00E+00         | -3.71            | 2.35E-12        | 8.81E-09         |
| NKD2INaked2-I5p15.3 protein-coding                                                                     | -1.21            | 2.05E-02        | 6.31E-01         | -4.84            | 5.68E-12        | 1.86E-08         |
| ABCA81-I-I17q24 protein-coding                                                                         | -2.54            | 1.67E-06        | 5.08E-04         | -3.95            | 8.81E-12        | 2.57E-08         |
| KCTD12IC13orf21PFET11PFETINI-I13q22.3 protein-coding                                                   | -2.10            | 1.16E-05        | 2.66E-03         | -3.33            | 4.17E-11        | 1.09E-07         |
| PDE1AICAM-PDE-1AIHCAM-1IHCAM1IHSPDE1AI-I2q32.1 protein-coding                                          | -3.72            | 1.71E-08        | 8.01E-06         | -4.40            | 1.24E-10        | 2.71E-07         |
| IGF1IIGF-IIIGF-IIIIGFII-I12q23.2 protein-coding                                                        | -2.18            | 5.59E-05        | 9.64E-03         | -4.03            | 1.23E-10        | 2.71E-07         |
| KCNJ2IATFB9IHHBIRK1IHHIRK1IIRK1IKIR2.1ILQT7ISQT3I-I17q24.3 protein-coding                              | -0.43            | 3.56E-01        | 1.00E+00         | -3.39            | 1.75E-10        | 3.53E-07         |
| HES1IHES-1IHHLLIHRyIbHLLHb39I-I3q28-q29 protein-coding                                                 | 2.89             | 2.18E-07        | 8.18E-05         | 3.51             | 3.23E-10        | 6.05E-07         |
| BRINP3IDBCCR1LIDBCCR1L1IFAM5C1-I1q31.1 protein-coding                                                  | -3.17            | 1.16E-06        | 3.80E-04         | -4.59            | 5.51E-10        | 9.63E-07         |
| CYP26B1CYP26A2IP450RAI-2IP450RAI2IRHFCAI-I2p13.2 protein-coding                                        | -1.55            | 3.27E-03        | 1.94E-01         | -3.81            | 1.31E-09        | 2.16E-06         |
| GUCY1B3IGC-S-beta-1IGC-SB3IGUC1B3IGUCB3IGUCSB3IGUCY1B1-I4q31.3-q33 protein-coding                      | -2.89            | 9.23E-08        | 3.72E-05         | -3.33            | 1.49E-09        | 2.18E-06         |
| COL5A31-I-I19p13.2 protein-coding                                                                      | 1.66             | 4.81E-04        | 5.07E-02         | 3.01             | 1.46E-09        | 2.18E-06         |
| RGS18IRGS13I-I1q31.2 protein-coding                                                                    | -0.42            | 3.96E-01        | 1.00E+00         | -3.50            | 1.71E-09        | 2.36E-06         |
| TNXBIEDS3IHXB1ITENXITN-XITNXITNXB1ITNXB2ITNXBSIVUR8IXBIXBSI-I6p21.3 protein-coding                     | -3.15            | 3.01E-08        | 1.34E-05         | -3.36            | 3.37E-09        | 4.42E-06         |
| C16orf89I-I16p13.3 protein-coding                                                                      | -2.67            | 8.08E-06        | 1.96E-03         | -3.84            | 3.63E-09        | 4.54E-06         |
| SPON1IVSGP/F-spondinI-I11p15.2 protein-coding                                                          | -3.37            | 9.90E-09        | 5.53E-06         | -3.41            | 4.06E-09        | 4.84E-06         |
| KCNK3IK2p3.1IOAT1IPPH4ITASKITASK-1ITBAK1-I12p23 protein-coding                                         | -3.31            | 8.56E-07        | 2.92E-04         | -4.06            | 1.63E-08        | 1.86E-05         |
| TSPAN12IEVR5INET-2INET2ITM4SF12I-I7q31.31 protein-coding                                               | -1.78            | 1.69E-04        | 2.31E-02         | -2.77            | 1.71E-08        | 1.88E-05         |
| SERPINE1IPAIIPAI-1IPAI1PLANH1I-I7q22.1 protein-coding                                                  | 1.03             | 2.61E-02        | 6.99E-01         | 2.74             | 2.27E-08        | 2.38E-05         |
| KCNG1IK13IKCNGIKV6.1kH2I-I20q13 protein-coding                                                         | 1.78             | 3.49E-04        | 3.97E-02         | 2.82             | 2.67E-08        | 2.69E-05         |
| HRIALUNCIAUIHSA277165IHYP4IMUHHIMUHH1I-I8p21.2 protein-coding                                          | -1.53            | 1.70E-03        | 1.25E-01         | -2.87            | 3.14E-08        | 3.01E-05         |
| HTR2BI5-HT(2B)I5-HT2BI-I2q36.3-q37.1 protein-coding                                                    | -1.43            | 4.96E-03        | 2.56E-01         | -3.08            | 3.31E-08        | 3.01E-05         |
| ITGB8I-I17p21.1 protein-coding                                                                         | -0.42            | 3.63E-01        | 1.00E+00         | -2.76            | 3.33E-08        | 3.01E-05         |
| ST8SIA1IGD3SISAT8ISAT8-AISAT8AIST8SialI-I12p12.1-p11.2 protein-coding                                  | -2.05            | 3.55E-03        | 2.04E-01         | -5.35            | 4.21E-08        | 3.68E-05         |
| KCNQ5IKv7.5I-I6q14 protein-coding                                                                      | 0.25             | 6.83E-01        | 1.00E+00         | 2.88             | 4.42E-08        | 3.74E-05         |
| OLFM2INOE2INOELIN2INOELIN2_V1OIofCI-I19p13.2 protein-coding                                            | 1.26             | 8.65E-03        | 3.73E-01         | 2.71             | 4.63E-08        | 3.80E-05         |
| SULF1IHSULF-1ISULF-1I-I8q13.2 protein-coding                                                           | -1.74            | 2.60E-04        | 3.27E-02         | -2.69            | 4.89E-08        | 3.89E-05         |
| AKR1C1I2-ALPHA-HSD12O-ALPHA-HSDIC9IDD1IDD1/DD2IDDHDDH1IH-37IHAKRCHHBABIMBABI-I10p15-p14 protein-coding | -1.76            | 2.81E-04        | 3.39E-02         | -2.75            | 5.12E-08        | 3.96E-05         |
| PLAUATFIBDPLT5IQPDIUPAIURKIu-PAI-I10q22.2 protein-coding                                               | 2.32             | 1.43E-06        | 4.47E-04         | 2.64             | 6.10E-08        | 4.45E-05         |
| HIST1H2BDIH2B.1BIH2B/bIH2BFBFIHRIPI2IdJ221C16.6I-I6p21.3 protein-coding                                | -1.99            | 6.75E-05        | 1.09E-02         | -2.81            | 6.06E-08        | 4.45E-05         |
| PKK4I-I17q21.3 protein-coding                                                                          | -0.15            | 7.55E-01        | 1.00E+00         | -2.88            | 7.00E-08        | 4.97E-05         |
| LINC01497I-I117q24.3 incRNA                                                                            | -3.49            | 2.15E-05        | 4.49E-03         | -5.24            | 8.89E-08        | 6.15E-05         |
| CCDC3I-I110p13 protein-coding                                                                          | 1.99             | 5.62E-05        | 9.64E-03         | 2.65             | 1.27E-07        | 8.52E-05         |
| NTSR1INTRI-I20q13 protein-coding                                                                       | 1.71             | 5.25E-03        | 2.66E-01         | 3.09             | 1.31E-07        | 8.62E-05         |
| SH2D5I-I1p36.12 protein-coding                                                                         | 1.16             | 2.33E-02        | 6.73E-01         | 2.70             | 1.57E-07        | 9.80E-05         |
| HIST1H2ACIH2A/IH2AFIdJ221C16.4I-I6p22.1 protein-coding                                                 | -0.82            | 9.72E-02        | 1.00E+00         | -2.87            | 1.57E-07        | 9.80E-05         |
| INSCI-I11p15.2 protein-coding                                                                          | 2.96             | 1.12E-08        | 6.00E-06         | 2.69             | 1.72E-07        | 1.00E-04         |
| TSPAN11VSSW1971I-I12p11.21 protein-coding                                                              | -1.27            | 1.52E-02        | 5.25E-01         | -3.01            | 1.70E-07        | 1.00E-04         |
| CYP1B1ICP1BICYP1B1GLC3AIP4501B1-I12p22.2 protein-coding                                                | -0.87            | 6.16E-02        | 1.00E+00         | -2.56            | 1.65E-07        | 1.00E-04         |
| DLL4Ihdelta2I-I15q14 protein-coding                                                                    | 2.29             | 2.41E-06        | 6.86E-04         | 2.55             | 1.96E-07        | 1.12E-04         |
| LAMA2ILAMMI-I6q22-q23 protein-coding                                                                   | -1.48            | 1.60E-03        | 1.21E-01         | -2.51            | 2.54E-07        | 1.42E-04         |
| APOL1IAPO-LIAPOLIAPOL-IFSGS4I-I22q13.1 protein-coding                                                  | -1.14            | 3.08E-02        | 7.78E-01         | -3.21            | 2.62E-07        | 1.43E-04         |
| SLC40A1IFPN1IHFE4IIREG1IMST079IMSTP079IMTP1I                                                           | -1.37            | 4.01E-03        | 2.24E-01         | -2.55            | 3.16E-07        | 1.70E-04         |
| SLC11A3I-I2q32 protein-coding                                                                          | 0.41             | 3.87E-01        | 1.00E+00         | -2.74            | 3.58E-07        | 1.88E-04         |
| C11orf96IAG2I-I11p11.2 protein-coding                                                                  | -1.67            | 2.10E-03        | 1.44E-01         | -3.08            | 3.77E-07        | 1.94E-04         |
| LINC01503I-I9q34.11 incRNA                                                                             | -1.67            | 2.10E-03        | 1.44E-01         | -3.08            | 3.77E-07        | 1.94E-04         |

| Gene Name                                                                      | Nup98 siRNA      |          |                  | sPom121 siRNA    |          |                  |
|--------------------------------------------------------------------------------|------------------|----------|------------------|------------------|----------|------------------|
|                                                                                | Log2 Fold Change | P-Value  | Adjusted P-Value | Log2 Fold Change | P-Value  | Adjusted P-Value |
| GCIDBPIDBP/GCIGRD3IHEL-S-51IVDBGIVDBPI-I4q12-q13 protein-coding                | -9.36            | 5.27E-38 | 1.38E-33         | -8.57            | 5.78E-35 | 1.52E-30         |
| NGFRICD271Gp80-LNGFRITNFRSF16p75(NTR) p75NTRI-I17q21-q22 protein-coding        | 3.02             | 8.53E-07 | 4.77E-04         | 5.41             | 3.44E-18 | 4.51E-14         |
| IGFBP5IIBP5-I2q35 protein-coding                                               | -5.00            | 1.44E-01 | 1.00E+00         | 6.52             | 5.78E-18 | 5.06E-14         |
| UGT2B15IHLUG4IUDPGT 2B8IUDPGT2B15IUDPGTH3IUGT2B8I-I4q13 protein-coding         | -5.00            | 7.45E-17 | 9.78E-13         | -4.38            | 4.67E-14 | 3.06E-10         |
| HABP2IFSAPIHABPIHGFBALPHBPI-I10q25.3 protein-coding                            | -5.63            | 2.17E-15 | 1.43E-11         | -4.72            | 1.64E-12 | 8.63E-09         |
| EREGERI-I4q13.3 protein-coding                                                 | 5.69             | 3.06E-16 | 2.68E-12         | 4.93             | 2.39E-12 | 1.04E-08         |
| CPLX2I921-LICPX-2ICPX2IHfb1-I5q35.2 protein-coding                             | 2.91             | 8.39E-09 | 9.70E-06         | 3.59             | 4.29E-12 | 1.61E-08         |
| GGT5IGGLIGGT 5IGGT-RELIGGTLA1I-I22q11.23 protein-coding                        | 3.55             | 1.45E-07 | 1.03E-04         | 4.56             | 6.83E-12 | 2.16E-08         |
| SLC16A6IMCT6IMCT7I-I17q24.2 protein-coding                                     | 3.69             | 1.48E-11 | 3.90E-08         | 3.77             | 7.42E-12 | 2.16E-08         |
| HMGCS2I-I1p13-p12 protein-coding                                               | -1.98            | 5.64E-05 | 1.29E-02         | -3.72            | 1.58E-11 | 4.15E-08         |
| BEAN1IBEANISCA31I-I16q21 protein-coding                                        | 0.80             | 2.68E-01 | 1.00E+00         | 3.98             | 4.36E-11 | 1.04E-07         |
| SETBP1IMRD29ISEBI-I18q21.1 protein-coding                                      | -3.35            | 1.10E-09 | 1.80E-06         | -3.80            | 5.48E-11 | 1.11E-07         |
| VGLL3IVGL-3IVGL3-I3p12.1 protein-coding                                        | -1.90            | 1.28E-04 | 2.14E-02         | -3.65            | 5.32E-11 | 1.11E-07         |
| UGT2B11I-I4q13.2 protein-coding                                                | -3.72            | 2.79E-12 | 9.16E-09         | -3.45            | 6.30E-11 | 1.18E-07         |
| PRF1IFLH2IHPLH2IP1IPFN1IPFP1-I10q22 protein-coding                             | 2.35             | 6.33E-04 | 6.96E-02         | 4.23             | 9.24E-11 | 1.62E-07         |
| CYP24A1ICP24ICYP24IHCAIIP450-CC24I-I20q13 protein-coding                       | 2.92             | 9.98E-09 | 1.05E-05         | 3.25             | 3.09E-10 | 5.07E-07         |
| SLC6A12IBGT-1IBGT1IGAT2I-I12p13 protein-coding                                 | -1.67            | 4.19E-04 | 5.23E-02         | -3.13            | 4.30E-10 | 6.64E-07         |
| PLP1IGPM6CIHLD1IMMPLIPLIPL/DM20IPMDISP2I-I Xq22 protein-coding                 | 5.99             | 1.79E-13 | 9.42E-10         | 5.14             | 5.09E-10 | 7.43E-07         |
| C14orf105I-I14q22.3 protein-coding                                             | -2.79            | 4.45E-07 | 2.66E-04         | -3.82            | 7.44E-10 | 1.03E-06         |
| LINC00324I17orf44INCRNA00324I-I17p13.1 lncRNA                                  | -3.78            | 9.77E-12 | 2.85E-08         | -3.30            | 1.70E-09 | 2.24E-06         |
| ZBED6IMGRI-I1q32.1 protein-coding                                              | -0.77            | 9.82E-02 | 1.00E+00         | -3.06            | 2.94E-09 | 3.67E-06         |
| KRT23ICK23IHAIK1IK23I-I17q21.2 protein-coding                                  | 1.86             | 1.21E-04 | 2.07E-02         | 2.93             | 4.92E-09 | 5.88E-06         |
| SLC5A3IBCW2ISMITISMIT1ISMIT2I-I21q22.12 protein-coding                         | -2.10            | 1.13E-05 | 3.62E-03         | -2.88            | 5.36E-09 | 5.94E-06         |
| RIPPLY3IDSCR6I-I21q22.2 protein-coding                                         | 1.58             | 1.05E-02 | 4.41E-01         | 3.47             | 5.43E-09 | 5.94E-06         |
| RBP1ICRABP-IICRBPIICRP1ICRBPIIRBPCI-I3q23 protein-coding                       | 1.66             | 1.11E-03 | 1.04E-01         | 2.97             | 1.25E-08 | 1.31E-05         |
| CDKL5IEIEE2ISIXSTK9I-Xp22 protein-coding                                       | -0.09            | 8.77E-01 | 1.00E+00         | -3.64            | 1.64E-08 | 1.65E-05         |
| ETNPPLIAGXT2L1-I4q25 protein-coding                                            | -2.42            | 1.40E-06 | 6.82E-04         | -2.90            | 2.39E-08 | 2.33E-05         |
| SGK2IH-SGK2IdJ138B7.2I-I20q13.2 protein-coding                                 | -2.32            | 2.22E-06 | 9.82E-04         | -2.79            | 2.52E-08 | 2.37E-05         |
| LYVE1ICRSBP-1IHARILYVE-1IXLKD1I-I11p15 protein-coding                          | 0.17             | 7.90E-01 | 1.00E+00         | 2.95             | 2.81E-08 | 2.51E-05         |
| KRTAP3-1IKAP3.1IKRTAP3.1I-I17q21.2 protein-coding                              | 4.50             | 1.12E-07 | 8.41E-05         | 4.69             | 2.86E-08 | 2.51E-05         |
| LINC00326INCRNA00326I-I6q23.2 lncRNA                                           | 3.36             | 3.80E-04 | 4.99E-02         | 4.67             | 3.55E-08 | 3.00E-05         |
| LOC101927884I-I2p12 lncRNA                                                     | 2.73             | 2.69E-05 | 7.14E-03         | 3.47             | 4.13E-08 | 3.39E-05         |
| MT1GIMT1IMT1KI-I16q13 protein-coding                                           | -2.62            | 2.65E-07 | 1.78E-04         | -2.81            | 5.85E-08 | 4.65E-05         |
| DIO1I5DIIIXDI1I-I1p33-p32 protein-coding                                       | -1.46            | 2.05E-03 | 1.52E-01         | -2.71            | 6.09E-08 | 4.70E-05         |
| CYP19A1IAROARO1ICPV1ICYARICYP19ICYPIXI P-450AROMI-I15q21.1 protein-coding      | 1.65             | 1.23E-03 | 1.14E-01         | 2.80             | 6.74E-08 | 5.06E-05         |
| NR5A2IB1FIB1F2ICPFIIFTZ-F1IFTZ-F1betaLRH-1ILRH1IhB1F-2I-I1q32.1 protein-coding | -2.41            | 6.20E-06 | 2.29E-03         | -3.06            | 1.04E-07 | 7.38E-05         |
| PON1IESAIMVCD5IPONI-I7q21.3 protein-coding                                     | -4.18            | 6.76E-13 | 2.96E-09         | -2.89            | 1.03E-07 | 7.38E-05         |
| FAM160A1I-I4q31.3 protein-coding                                               | -0.62            | 1.94E-01 | 1.00E+00         | -2.89            | 1.20E-07 | 7.65E-05         |
| MMP2ICLG4ICLG4AIMMP-2IMMP-IIIMONAI TBE-1I-I16q13-q21 protein-coding            | 2.16             | 6.07E-05 | 1.34E-02         | 2.88             | 1.14E-07 | 7.65E-05         |
| HRGIHPRGIHRGPITHPH1I-I3q27 protein-coding                                      | -2.51            | 1.31E-05 | 3.96E-03         | -3.48            | 1.17E-07 | 7.65E-05         |
| LOC102724550I-I-lncRNA                                                         | -1.27            | 1.55E-02 | 5.45E-01         | -3.38            | 1.13E-07 | 7.65E-05         |
| MBOAT4IFKSG89IGOATIOACT4I-I8p12 protein-coding                                 | -1.68            | 5.90E-04 | 6.56E-02         | -2.76            | 1.24E-07 | 7.74E-05         |
| ANXA13IANX13ISAI-I8q24.13 protein-coding                                       | -2.58            | 9.11E-07 | 4.88E-04         | -2.86            | 1.71E-07 | 1.04E-04         |
| CACNG4I-I17q24 protein-coding                                                  | 6.42             | 2.92E-03 | 1.92E-01         | 8.14             | 2.34E-07 | 1.35E-04         |
| KLHDC7BI-I122q13.33 protein-coding                                             | 7.11             | 1.75E-04 | 2.76E-02         | 8.14             | 2.34E-07 | 1.35E-04         |
| AMOTI-IIXq23 protein-coding                                                    | -2.31            | 1.20E-04 | 2.07E-02         | -3.78            | 2.37E-07 | 1.35E-04         |
| CYP3A7-CYP3A5I CYP3A7-3AP1ICYP3A7-CYP3AP1I CYP3A7.1I-I7q22.1 protein-coding    | -2.05            | 2.36E-05 | 6.38E-03         | -2.55            | 2.57E-07 | 1.44E-04         |
| SLCO4C1IOATP-HIOATP-M1OATP4C1IOATPXIPRO2176I SLC21A20I-I5q21.2 protein-coding  | -1.05            | 2.47E-02 | 6.81E-01         | -2.54            | 2.71E-07 | 1.48E-04         |
| LCN15I PRO6093IUNQ2541I-I9q34.3 protein-coding                                 | 0.53             | 3.04E-01 | 1.00E+00         | 2.64             | 2.82E-07 | 1.51E-04         |
| EDN1IARCN3IET1IHDLQC7I PPET1IQMEI-I6p24.1 protein-coding                       | 3.36             | 8.49E-09 | 9.70E-06         | 3.04             | 3.55E-07 | 1.86E-04         |

A

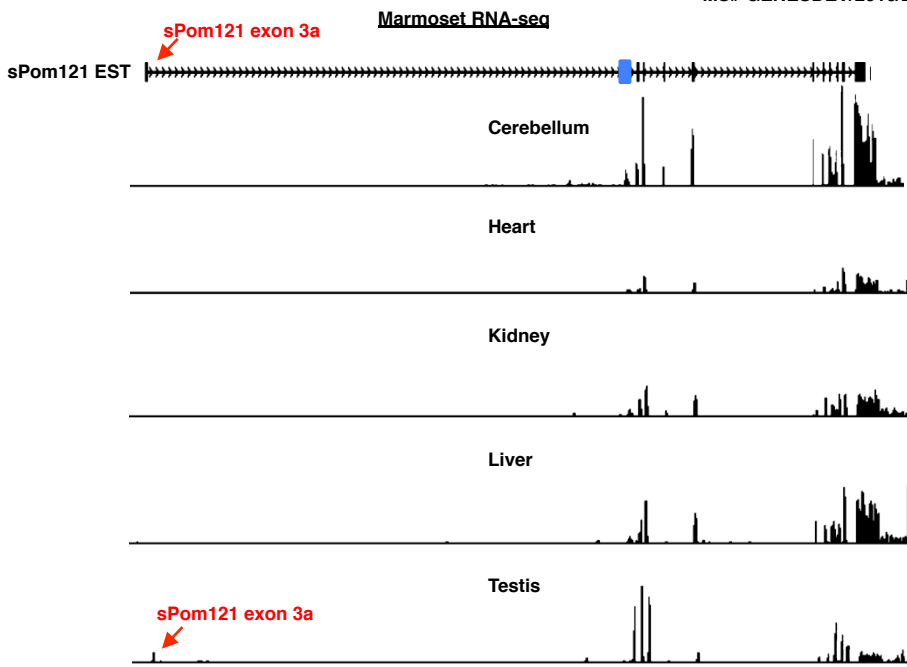

B

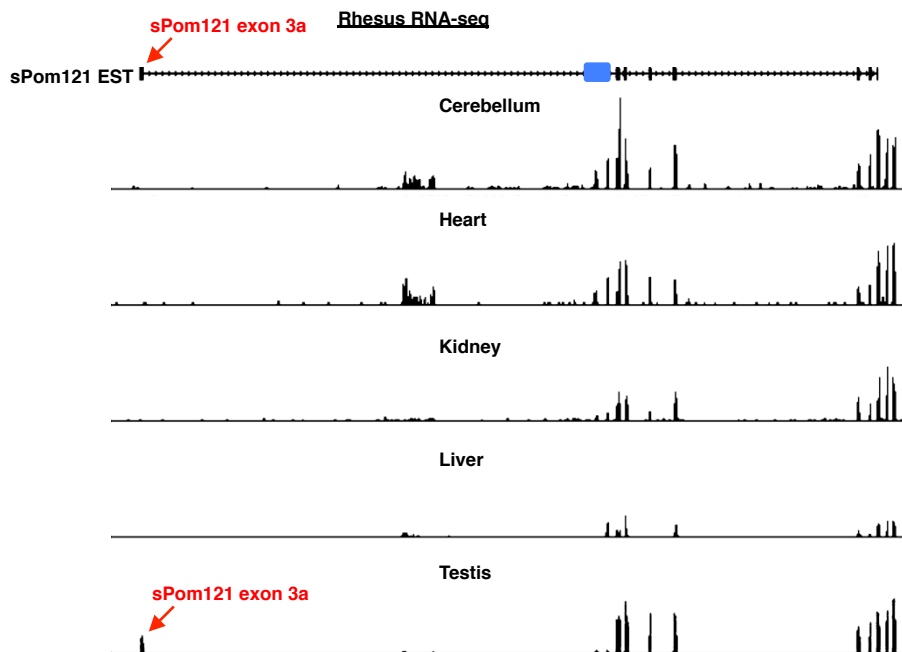

C

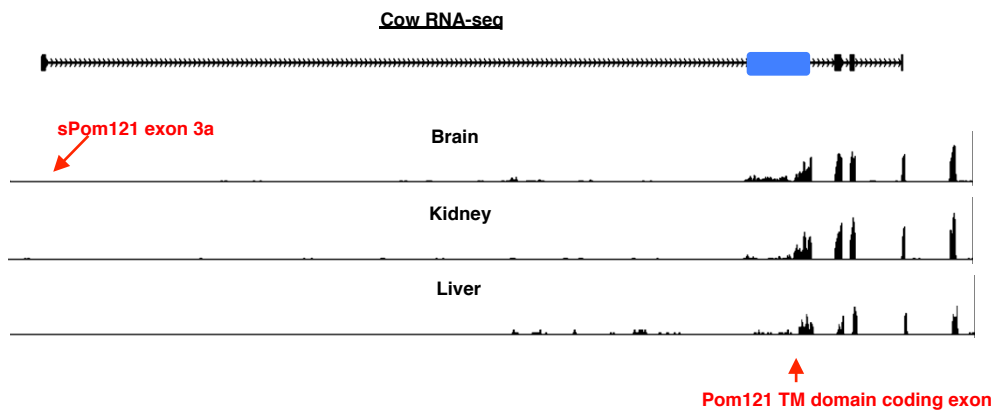

Supplement: supp_gad.280941.116_Supplemental_Material.pdf [file supp_gad.280941.116_Supplemental_Material.pdf]
